# Supplementary material for: Inactivation mechanism of N61S mutant of human FMO3 towards trimethylamine
Source: PubMed Central journal article supplement (PMC5676948; doi:10.1038/s41598-017-15224-9), 2017-11-07
Supplement: 41598_2017_15224_MOESM1_ESM.pdf [file 41598_2017_15224_MOESM1_ESM.pdf]

## **SUPPLEMENTARY INFORMATION**

### **Inactivation mechanism of N61S mutant of human FMO3 towards trimethylamine**

Chongliang Gao, Gianluca Catucci, Silvia Castrignanò, Gianfranco Gilardi and Sheila J. Sadeghi\*

*Department of Life Sciences and Systems Biology, University of Torino, Italy*

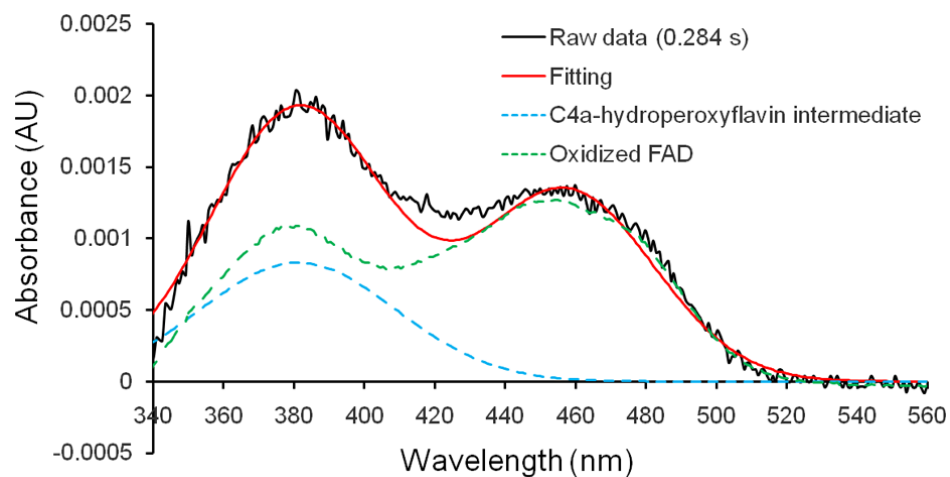

**Figure S1**

UV-vis spectrum of C4a-hydroperoxyflavin intermediate of hFMO3 with a maximum absorbance at 381 nm, observed by deconvolution of the single spectrum of the stopped-flow data shown in Fig. 1A (0.284 s).

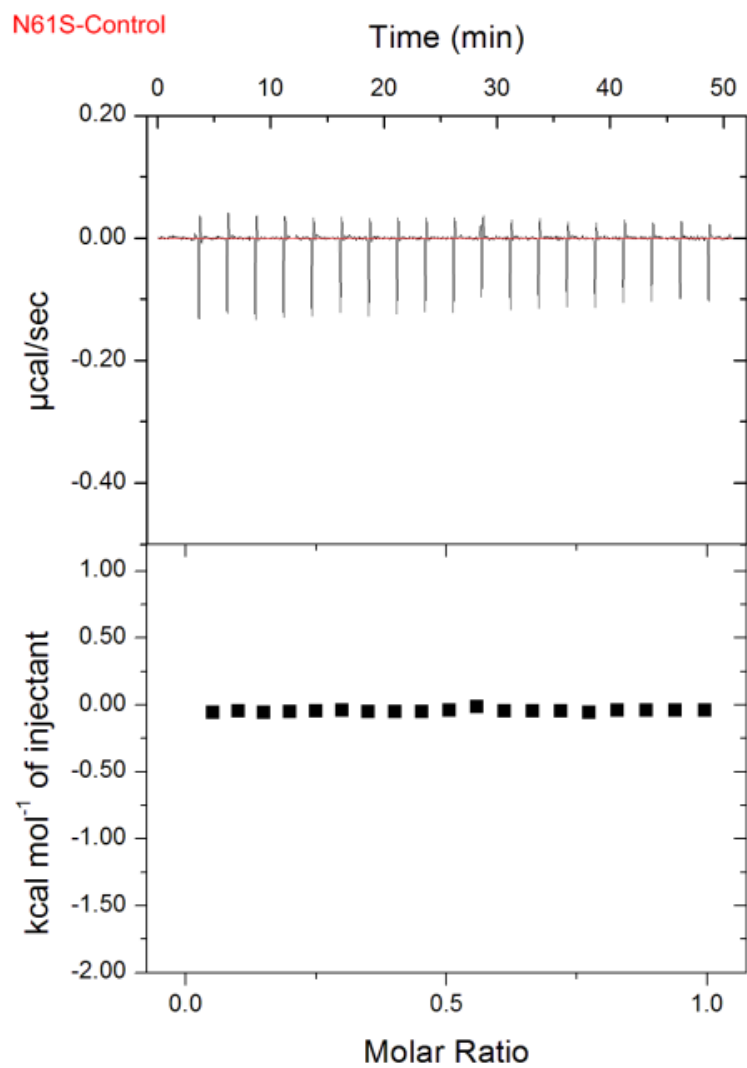

**Figure S2**

Control Isothermal Titration Calorimetry (ITC) experiments. The titration of N61S mutant was carried out with 8 mM NADP<sup>+</sup>. For control experiment, the sample cell contained buffer and the ligand, NADP<sup>+</sup>, was in the injector syringe.

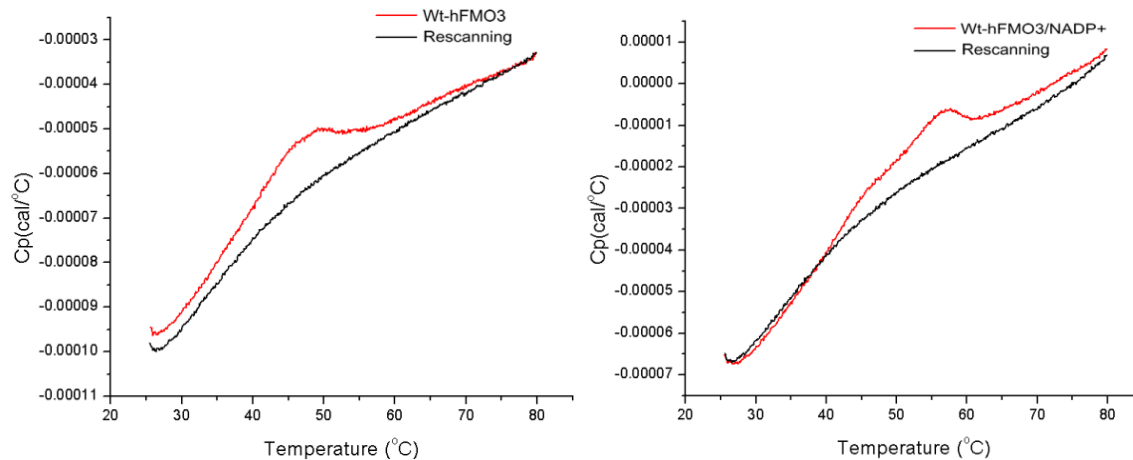

**Figure S3**

Differential scanning calorimetry (DSC). Human FMO3 unfolding is irreversible as shown by the rescanned DSC thermographs both in the absence (left) and presence (right) of NADP<sup>+</sup>. Initial scans (red line) were performed from 30 °C to 75 °C and immediately cooled back to 30 °C and held for 10 min for equilibration. This was followed by a second scan, rescan (black line), with the same scan rate.



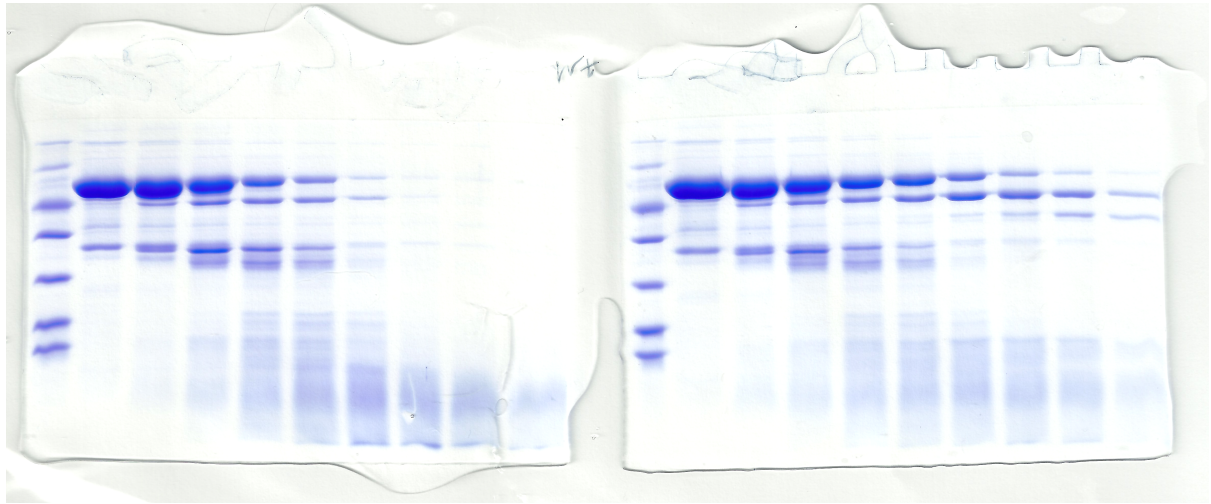

**Figure S4**

Scan of original SDS-PAGE gels of WT-hFMO3 trypsin digestion in the absence (left) and presence of NADP+ (right). Protein concentration was 1.45  $\mu\text{g}/\mu\text{l}$  digested with 0.75  $\mu\text{g}/\mu\text{l}$  of trypsin at 37  $^{\circ}\text{C}$ .

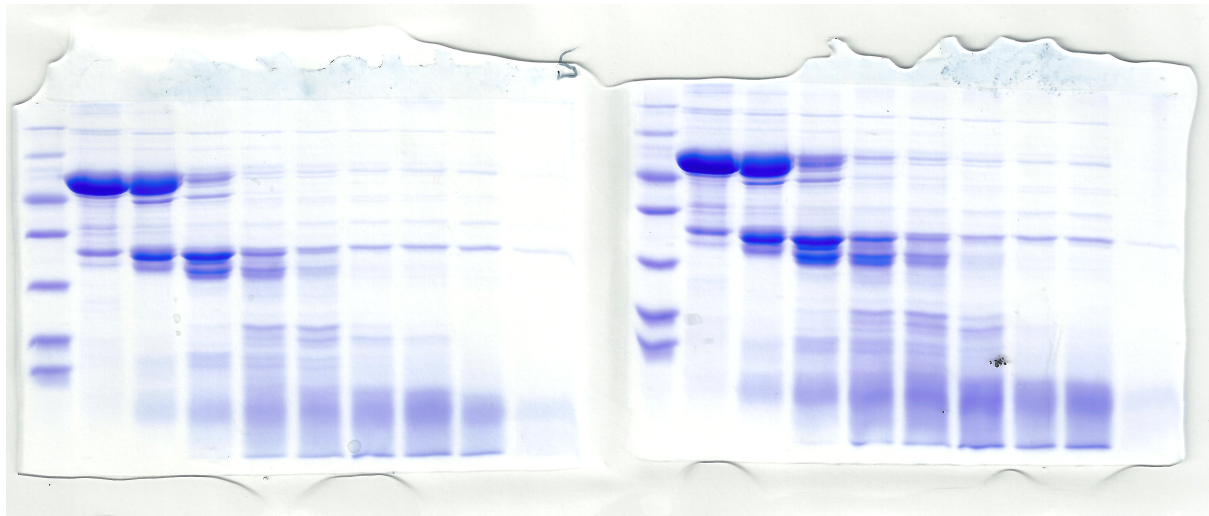

**Figure S5**

Scan of original SDS-PAGE gels of the trypsin digestion of N61S mutant in the absence (left) and presence of NADP<sup>+</sup> (right). Protein concentration was 1.45  $\mu\text{g}/\mu\text{l}$  digested with 0.75  $\mu\text{g}/\mu\text{l}$  of trypsin at 37 °C.
